# Supplementary material
Source: publisher figshare collection journal article supplement (https://acs.figshare.com/ndownloader/files/4717936)
Supplement: Supplementary file 1 [file 4717936]

 
data_F2OXeNCCH3 
 
_audit_creation_method            SHELXL-97 
_chemical_name_systematic 
; 
 ? 
; 
_chemical_name_common             ? 
_chemical_melting_point           ? 
_chemical_formula_moiety          ? 
_chemical_formula_sum 
 'C2 H3 F2 N O Xe' 
_chemical_formula_weight          226.35 
 
loop_ 
 _atom_type_symbol 
 _atom_type_description 
 _atom_type_scat_dispersion_real 
 _atom_type_scat_dispersion_imag 
 _atom_type_scat_source 
 'C'  'C'   0.0033   0.0016 
 'International Tables Vol C Tables 4.2.6.8 and 6.1.1.4' 
 'H'  'H'   0.0000   0.0000 
 'International Tables Vol C Tables 4.2.6.8 and 6.1.1.4' 
 'N'  'N'   0.0061   0.0033 
 'International Tables Vol C Tables 4.2.6.8 and 6.1.1.4' 
 'O'  'O'   0.0106   0.0060 
 'International Tables Vol C Tables 4.2.6.8 and 6.1.1.4' 
 'F'  'F'   0.0171   0.0103 
 'International Tables Vol C Tables 4.2.6.8 and 6.1.1.4' 
 'Xe'  'Xe'  -0.4205   1.9578 
 'International Tables Vol C Tables 4.2.6.8 and 6.1.1.4' 
 
_symmetry_cell_setting            ? 
_symmetry_space_group_name_H-M    ? 
 
loop_ 
 _symmetry_equiv_pos_as_xyz 
 'x, y, z' 
 '-x, y+1/2, -z+1/2' 
 '-x, -y, -z' 
 'x, -y-1/2, z-1/2' 
 
_cell_length_a                    8.7819(4) 
_cell_length_b                    13.9862(6) 
_cell_length_c                    11.0182(6) 
_cell_angle_alpha                 90.00 
_cell_angle_beta                  128.476(2) 
_cell_angle_gamma                 90.00 
_cell_volume                      1059.47(9) 
_cell_formula_units_Z             8 
_cell_measurement_temperature     100(2) 
_cell_measurement_reflns_used     ? 
_cell_measurement_theta_min       ? 
_cell_measurement_theta_max       ? 
 
_exptl_crystal_description        ? 
_exptl_crystal_colour             ? 
_exptl_crystal_size_max           ? 
_exptl_crystal_size_mid           ? 
_exptl_crystal_size_min           ? 
_exptl_crystal_density_meas       ? 
_exptl_crystal_density_diffrn     2.838 
_exptl_crystal_density_method     'not measured' 
_exptl_crystal_F_000              816 
_exptl_absorpt_coefficient_mu     6.433 
_exptl_absorpt_correction_type    ? 
_exptl_absorpt_correction_T_min   ? 
_exptl_absorpt_correction_T_max   ? 
_exptl_absorpt_process_details    ? 
 
_exptl_special_details 
; 
 ? 
; 
 
_diffrn_ambient_temperature       100(2) 
_diffrn_radiation_wavelength      0.71073 
_diffrn_radiation_type            MoK\a 
_diffrn_radiation_source          'fine-focus sealed tube' 
_diffrn_radiation_monochromator   graphite 
_diffrn_measurement_device_type   ? 
_diffrn_measurement_method        ? 
_diffrn_detector_area_resol_mean  ? 
_diffrn_standards_number          ? 
_diffrn_standards_interval_count  ? 
_diffrn_standards_interval_time   ? 
_diffrn_standards_decay_%         ? 
_diffrn_reflns_number             18446 
_diffrn_reflns_av_R_equivalents   0.0418 
_diffrn_reflns_av_sigmaI/netI     0.0260 
_diffrn_reflns_limit_h_min        -11 
_diffrn_reflns_limit_h_max        11 
_diffrn_reflns_limit_k_min        -18 
_diffrn_reflns_limit_k_max        15 
_diffrn_reflns_limit_l_min        -14 
_diffrn_reflns_limit_l_max        14 
_diffrn_reflns_theta_min          1.46 
_diffrn_reflns_theta_max          28.37 
_reflns_number_total              2623 
_reflns_number_gt                 2190 
_reflns_threshold_expression      >2sigma(I) 
 
_computing_data_collection        ? 
_computing_cell_refinement        ? 
_computing_data_reduction         ? 
_computing_structure_solution     'SHELXS-97 (Sheldrick, 1990)' 
_computing_structure_refinement   'SHELXL-97 (Sheldrick, 1997)' 
_computing_molecular_graphics     ? 
_computing_publication_material   ? 
 
_refine_special_details 
; 
 Refinement of F^2^ against ALL reflections.  The weighted R-factor wR and 
 goodness of fit S are based on F^2^, conventional R-factors R are based 
 on F, with F set to zero for negative F^2^. The threshold expression of 
 F^2^ > 2sigma(F^2^) is used only for calculating R-factors(gt) etc. and is 
 not relevant to the choice of reflections for refinement.  R-factors based 
 on F^2^ are statistically about twice as large as those based on F, and R- 
 factors based on ALL data will be even larger. 
; 
 
_refine_ls_structure_factor_coef  Fsqd  
_refine_ls_matrix_type            full 
_refine_ls_weighting_scheme       calc  
_refine_ls_weighting_details 
 'calc w=1/[\s^2^(Fo^2^)+(0.0267P)^2^+0.0000P] where P=(Fo^2^+2Fc^2^)/3' 
_atom_sites_solution_primary      direct 
_atom_sites_solution_secondary    difmap 
_atom_sites_solution_hydrogens    geom 
_refine_ls_hydrogen_treatment     mixed 
_refine_ls_extinction_method      SHELXL 
_refine_ls_extinction_coef        0.00073(13) 
_refine_ls_extinction_expression 
 'Fc^*^=kFc[1+0.001xFc^2^\l^3^/sin(2\q)]^-1/4^' 
_refine_ls_number_reflns          2623 
_refine_ls_number_parameters      129 
_refine_ls_number_restraints      0 
_refine_ls_R_factor_all           0.0428 
_refine_ls_R_factor_gt            0.0299 
_refine_ls_wR_factor_ref          0.0675 
_refine_ls_wR_factor_gt           0.0642 
_refine_ls_goodness_of_fit_ref    1.400 
_refine_ls_restrained_S_all       1.400 
_refine_ls_shift/su_max           0.001 
_refine_ls_shift/su_mean          0.000 
 
loop_ 
 _atom_site_label 
 _atom_site_type_symbol 
 _atom_site_fract_x 
 _atom_site_fract_y 
 _atom_site_fract_z 
 _atom_site_U_iso_or_equiv 
 _atom_site_adp_type 
 _atom_site_occupancy 
 _atom_site_symmetry_multiplicity 
 _atom_site_calc_flag 
 _atom_site_refinement_flags 
 _atom_site_disorder_assembly 
 _atom_site_disorder_group 
Xe2 Xe 0.27254(4) 0.26869(2) 1.00284(3) 0.01402(10) Uani 1 1 d . . . 
O2 O 0.2689(5) 0.3955(3) 1.0156(4) 0.0192(8) Uani 1 1 d . . . 
F3 F -0.0137(4) 0.2568(2) 0.8571(3) 0.0214(7) Uani 1 1 d . . . 
F4 F 0.5601(4) 0.2606(2) 1.1465(3) 0.0183(6) Uani 1 1 d . . . 
N2 N 0.2691(7) 0.0748(4) 0.9585(5) 0.0247(10) Uani 1 1 d . . . 
C20 C 0.2559(7) 0.0288(4) 0.8684(6) 0.0185(11) Uani 1 1 d . . . 
C21 C 0.2331(7) -0.0298(5) 0.7490(6) 0.0242(12) Uani 1 1 d . . . 
H21A H 0.1005 -0.0554 0.6804 0.029 Uiso 1 1 calc R . . 
H21B H 0.3263 -0.0828 0.7977 0.029 Uiso 1 1 calc R . . 
H21C H 0.2570 0.0092 0.6886 0.029 Uiso 1 1 calc R . . 
Xe1 Xe -0.25457(4) 0.26319(2) 0.98683(3) 0.01447(10) Uani 1 1 d . . . 
O1 O -0.4400(6) 0.3518(3) 0.8940(5) 0.0347(11) Uani 1 1 d . . . 
F1 F -0.4442(5) 0.1588(3) 0.8966(4) 0.0323(8) Uani 1 1 d . . . 
F2 F -0.0449(5) 0.3573(3) 1.0881(4) 0.0398(10) Uani 1 1 d . . . 
N1 N 0.0505(7) 0.1297(4) 1.1347(5) 0.0246(11) Uani 1 1 d . . . 
C10 C 0.1423(7) 0.0618(4) 1.1848(6) 0.0195(11) Uani 1 1 d . . . 
C11 C 0.2610(8) -0.0235(5) 1.2511(6) 0.0228(12) Uani 1 1 d . . . 
H11A H 0.3319 -0.0238 1.3635 0.027 Uiso 1 1 calc R . . 
H11B H 0.3540 -0.0242 1.2298 0.027 Uiso 1 1 calc R . . 
H11C H 0.1776 -0.0802 1.2050 0.027 Uiso 1 1 calc R . . 
 
loop_ 
 _atom_site_aniso_label 
 _atom_site_aniso_U_11 
 _atom_site_aniso_U_22 
 _atom_site_aniso_U_33 
 _atom_site_aniso_U_23 
 _atom_site_aniso_U_13 
 _atom_site_aniso_U_12 
Xe2 0.01063(14) 0.0193(2) 0.00999(17) 0.00026(13) 0.00535(14) -0.00047(12) 
O2 0.0179(17) 0.016(2) 0.0157(19) -0.0019(15) 0.0068(17) 0.0004(15) 
F3 0.0126(13) 0.0298(19) 0.0150(15) -0.0004(14) 0.0052(13) -0.0013(13) 
F4 0.0116(12) 0.0280(19) 0.0116(15) 0.0022(13) 0.0053(12) 0.0012(12) 
N2 0.027(2) 0.027(3) 0.021(3) 0.001(2) 0.015(2) -0.001(2) 
C20 0.015(2) 0.016(3) 0.020(3) 0.003(2) 0.009(2) 0.001(2) 
C21 0.019(3) 0.031(3) 0.020(3) 0.001(2) 0.011(3) 0.001(2) 
Xe1 0.01157(15) 0.0198(2) 0.01072(16) 0.00012(13) 0.00630(13) 0.00112(13) 
O1 0.041(2) 0.039(3) 0.029(2) 0.014(2) 0.024(2) 0.024(2) 
F1 0.0314(18) 0.043(2) 0.029(2) -0.0143(17) 0.0216(17) -0.0182(16) 
F2 0.042(2) 0.049(3) 0.028(2) -0.0160(18) 0.0219(19) -0.0278(18) 
N1 0.023(2) 0.030(3) 0.021(2) 0.003(2) 0.014(2) 0.004(2) 
C10 0.016(2) 0.027(4) 0.011(3) -0.001(2) 0.005(2) -0.002(2) 
C11 0.022(3) 0.022(3) 0.018(3) 0.003(2) 0.009(3) 0.004(2) 
 
_geom_special_details 
; 
 All esds (except the esd in the dihedral angle between two l.s. planes) 
 are estimated using the full covariance matrix.  The cell esds are taken 
 into account individually in the estimation of esds in distances, angles 
 and torsion angles; correlations between esds in cell parameters are only 
 used when they are defined by crystal symmetry.  An approximate (isotropic) 
 treatment of cell esds is used for estimating esds involving l.s. planes. 
; 
 
loop_ 
 _geom_bond_atom_site_label_1 
 _geom_bond_atom_site_label_2 
 _geom_bond_distance 
 _geom_bond_site_symmetry_2 
 _geom_bond_publ_flag 
Xe2 O2 1.781(4) . ? 
Xe2 F3 1.975(3) . ? 
Xe2 F4 1.981(3) . ? 
N2 C20 1.127(7) . ? 
C20 C21 1.454(8) . ? 
Xe1 O1 1.778(4) . ? 
Xe1 F2 1.952(3) . ? 
Xe1 F1 1.958(3) . ? 
N1 C10 1.142(7) . ? 
C10 C11 1.448(8) . ? 
 
loop_ 
 _geom_angle_atom_site_label_1 
 _geom_angle_atom_site_label_2 
 _geom_angle_atom_site_label_3 
 _geom_angle 
 _geom_angle_site_symmetry_1 
 _geom_angle_site_symmetry_3 
 _geom_angle_publ_flag 
O2 Xe2 F3 94.10(15) . . ? 
O2 Xe2 F4 94.03(15) . . ? 
F3 Xe2 F4 171.86(13) . . ? 
N2 C20 C21 178.4(6) . . ? 
O1 Xe1 F2 93.4(2) . . ? 
O1 Xe1 F1 92.4(2) . . ? 
F2 Xe1 F1 174.17(16) . . ? 
N1 C10 C11 178.9(6) . . ? 
 
_diffrn_measured_fraction_theta_max    0.988 
_diffrn_reflns_theta_full              28.37 
_diffrn_measured_fraction_theta_full   0.988 
_refine_diff_density_max    2.020 
_refine_diff_density_min   -1.445 
_refine_diff_density_rms    0.200 
